# Whole-genome sequencing of three native cattle breeds originating from the northernmost cattle farming regions

1 **Melak Weldenegodguad<sup>1,2</sup>, Ruslan Popov<sup>3</sup>, Kisun Pokharel<sup>1</sup>, Innokentyi Ammosov<sup>4</sup>, Ming**  
2 **Yao<sup>5</sup>, Zoya Ivanova<sup>6</sup> and Juha Kantanen<sup>1\*</sup>**

3 <sup>1</sup>Production Systems Department, Natural Resources Institute Finland (Luke), Jokioinen, Finland

4 <sup>2</sup>Department of Environmental and Biological Sciences, University of Eastern Finland, Kuopio,  
5 Finland

6 <sup>3</sup>Yakutian Research Institute of Agriculture (FGBNU Yakutskij NIISH), Yakutsk, Russia

7 <sup>4</sup>Board of Agricultural Office of Eveno-Bytantaj Region, Yakutia, Russia

8 <sup>5</sup>BGI-Shenzhen, Shenzhen, China

9 <sup>6</sup> Autumnwood Ct SE 22344, Yelm WA 98597, USA

10

11 **\* Correspondence:**

12 Juha Kantanen

13 juha.kantanen@luke.fi

14 **Keywords: adaptation, demographic history, Finncattle, indels, selective sweeps, SNPs, WGS,**

15 **Yakutian cattle**

16 **Abstract**

17 Northern Fennoscandia and the Sakha Republic in the Russian Federation represent the northernmost  
18 regions on Earth where cattle farming has been traditionally practiced. In this study, we performed  
19 whole-genome resequencing to genetically characterize three rare native breeds Eastern Finncattle,  
20 Western Finncattle and Yakutian cattle adapted to these northern Eurasian regions. We examined the  
21 demographic history, genetic diversity and unfolded loci under natural or artificial selection. On  
22 average, we achieved 13.01-fold genome coverage after mapping the sequencing reads on the bovine  
23 reference genome (UMD 3.1) and detected a total of 17.45 million single nucleotide polymorphisms  
24 (SNPs) and 1.95 million insertions-deletions (indels). We observed that the ancestral species (*Bos*  
25 *primigenius*) of Eurasian taurine cattle experienced two notable prehistorical declines in effective  
26 population size associated with dramatic climate changes. The modern Yakutian cattle exhibited a  
27 higher level of within-population variation in terms of number of SNPs and nucleotide diversity than  
28 the contemporary European taurine breeds. This result is in contrast to the results of marker-based  
29 cattle breed diversity studies, indicating assortment bias in previous analyses. Our results suggest that  
30 the effective population size of the ancestral Asiatic taurine cattle may have been higher than that of  
31 the European cattle. Alternatively, our findings could indicate the hybrid origins of the Yakutian  
32 cattle ancestries and possibly the lack of intensive artificial selection. We identified a number of  
33 genomic regions under selection that may have contributed to the adaptation to the northern and  
34 subarctic environments, including genes involved in disease resistance, sensory perception, cold  
35 adaptation and growth. By characterizing the native breeds, we were able to obtain new information  
36 on cattle genomes and on the value of the adapted breeds for the conservation of cattle genetic  
37 resources.

38 **Introduction**

39 During their 8,000-10,000 years of domestication, taurine cattle (*Bos taurus*) have adapted to a wide  
40 variety of biogeographic zones and sociocultural environments as a result of natural and human-  
41 derived selection (Felius, 1995). Fennoscandia along with northwestern Russia and the region of  
42 Sakha (Yakutia) in eastern Siberia, are the northernmost territories where cattle farming has had a  
43 relatively long tradition as the livelihood of local people (Kopoteva and Partanen, 2009; Bläuer and  
44 Kantanen, 2013; Cramp et al., 2014; Egorov et al., 2015). In prehistoric and historic times, animal  
45 husbandry faced several challenges in these northern climatic conditions, such as short summers and  
46 limited vegetation resources for feeding during the long winters, and this practice required well-  
47 adapted animals that were suited to the available environmental resources and socioeconomic and  
48 cultural conditions (Kantanen et al., 2009a; Bläuer and Kantanen, 2013; Egorov et al., 2015).

49 Cattle breeds such as Eastern Finncattle, Icelandic cattle, Swedish Mountain cattle, Yakutian cattle  
50 and other northern native cattle breeds are assumed to have their origins in the near-eastern  
51 domesticated taurine cattle that once spread to these northern regions (Kantanen et al., 2000, 2009a;  
52 Li et al., 2007). Herd books, pedigree registers and breeding associations were established in the late  
53 19th and early 20th centuries. Early native breeds had a pivotal socioeconomic role in dairy and beef  
54 production in the northern Eurasian regions but have been almost exclusively replaced by  
55 commercial international cattle populations bred for high-input, high-output farming systems.

56 Exceptions to this trend are Yakutian cattle in Siberia and Icelandic cattle, which continue to have  
57 high regional importance in food production (Kantanen et al., 2000, 2009a). The conservation of the  
58 genetic resources of native, typically low-profit breeds is often motivated by the fact that these breeds  
59 may possess valuable genetic variations for future animal breeding and to address the challenges that  
60 animal production will face during adaptation to future conditions, brought about by factors such as  
61 climate change (Odegård et al., 2009; Boettcher et al., 2010; Kantanen et al., 2015). In addition,

62 breeds such as Yakutian cattle exhibit adaptation in demanding environments and may be extremely  
63 useful for enabling animal production in marginal regions (Kantanen et al., 2015).

64 Previous studies on the characterization of cattle genetic resources in northern Eurasian breeds have  
65 used various methods to study within-breed genetic diversity, population structure, demographic  
66 factors and interbreed relationships, e.g., autosomal and Y-chromosomal microsatellites,  
67 mitochondrial D-loop and whole-genome SNP-marker scans (Li et al., 2007; Kantanen et al., 2009b;  
68 Iso-Touru et al., 2016). These studies have indicated, for example, the genetic distinctiveness of the  
69 native northern European cattle breeds (e.g., the Finnish native breeds and Yakutian cattle) from  
70 modern commercial dairy breeds (such as the Finnish Ayrshire and Holstein breeds). In addition, a  
71 whole-genome SNP genotyping analysis detected genomic regions targeted by selection, which, for  
72 example, contain immune-related genes (Iso-Touru et al., 2016). Whole-genome sequencing (WGS)-  
73 based approaches provide additional possibilities for investigation of the genetic diversity of  
74 livestock breeds adapted to various biogeographic regions and production environments. Moreover,  
75 recent advancements in bioinformatics and statistical tools have enhanced our understanding of the  
76 demographic evolution of domestic animal species, the possible role of genomic structural variations  
77 in the adaptation of livestock breeds in the course of domestication and selection and the biological  
78 functions of these genomic variations (Gutenkunst et al., 2009; Li and Durbin, 2011; Alachiotis et al.,  
79 2012; Pavlidis et al., 2013; Wang et al., 2014b; Librado et al., 2015).

80 To expand our knowledge of genomic variations in northern Eurasian taurine cattle, we performed  
81 whole-genome resequencing of five animals from each of three northern native breeds, namely,  
82 Eastern Finncattle, Western Finncattle and Yakutian cattle (Figure 1). We examined the genetic  
83 diversity and population structures of the breeds and identified chromosomal regions and genes under  
84 selection pressure. We also studied the demographic history of the northern Eurasian taurine cattle by  
85 using the whole-genome sequence data.

## 86 MATERIALS AND METHODS

### 87 Ethics statement

88 Blood samples of animals for DNA extraction were collected by using a protocol approved by the  
89 Animal Experiment Board of MTT Agrifood Research Finland (currently the Natural Resources  
90 Institute Finland, Luke) and the Board of Agricultural Office of Eveno-Bytantaj Region, Sakkyryr,  
91 Sakha, Russia.

### 92 DNA sample preparation and sequencing

93 DNA extracted from blood samples was available for the two Finnish cattle breeds (Eastern  
94 Finncattle and Western Finncattle) and one Siberian breed (Yakutian cattle) from a previous study  
95 (Li et al., 2007). Five unrelated individuals from each breed (14 females and one Yakutian cattle bull)  
96 were examined. Genomic DNA was extracted using a standard phenol/chloroform-based protocol  
97 (Malke, 1990). For sequencing library preparation following the manufacturer's specifications, the  
98 genomic DNA of each individual was fragmented randomly. After electrophoresis, DNA fragments  
99 of desired length were gel purified. One type of library was constructed for each sample (500 bp  
100 insert size); 15 paired-end DNA libraries were constructed for the 15 samples. Adapter ligation and  
101 DNA cluster preparation were performed, and the DNA was subjected to Illumina HiSeq 2000  
102 sequencing using the  $2 \times 100$  bp mode at Beijing Genomics Institute (BGI). Finally, paired-end  
103 sequence data were generated. To ensure quality, the raw data was modified by the following 2 steps:  
104 first, the contaminating adapter sequences from the reads were deleted, and then, the reads that  
105 contained more than 50% low-quality bases (quality value  $\leq 5$ ) were removed.

### 106 Short read alignment and mapping

107 For short read alignment, the bovine reference genome (UMD 3.1), including regions that were not  
108 assembled into chromosomes (Zimin et al., 2009), were downloaded from the Ensembl database  
109 release 71 (Flicek et al., 2013) and indexed using SAMtools v0.1.19 (Li et al., 2009). Paired-end 100-  
110 bp short reads from each individual sample were mapped against the bovine reference genome  
111 assembly UMD 3.1 using BWA v0.7.5a with the default parameters. After mapping, for downstream  
112 SNP and insertion-deletion (indel) detection, the SAM files that were generated from BWA were  
113 converted to the corresponding binary equivalent BAM files and sorted simultaneously using  
114 SortSam.jar in Picard tools v1.102 (<http://picard.sourceforge.net/>). We used Picard tools to remove  
115 PCR duplicates from the aligned reads and then used the uniquely mapped reads for variant calling.

#### 116 **SNP and indel detection**

117 We used the Genome Analysis Toolkit (GATK) v2.6-4 according to the GATK best practices  
118 pipeline (McKenna et al., 2010; DePristo et al., 2011; Van der Auwera A. et al., 2013) for  
119 downstream SNP and indel calling. We used RealignerTargetCreator to identify poorly mapped  
120 regions (nearby indels) from the alignments and realigned these regions using IndelRealigner. Next,  
121 the UnifiedGenotyper was used to call SNPs and indels with a Phred scale quality greater than 30.  
122 After SNP calling, we used VariantFiltration to discard sequencing and alignment artifacts from the  
123 SNPs with the parameters “ $MQ0 \geq 4 \ \&\& \ ((MQ0 / (1.0 * DP)) > 0.1)$ ”, “ $SB \geq -1.0, QUAL < 10$ ”, and  
124 “ $QUAL < 30.0 \ || \ QD < 5.0 \ || \ HRun > 5 \ || \ SB > -0.10$ ” and from the indels with the parameters “ $QD <$   
125  $2.0$ ”, “ $FS > 200.0$ ” and “ $ReadPosRankSum < -20.0$ ”. All the variants that passed the above filtering  
126 criteria were used in the downstream analysis and compared to the cattle dbSNP148 (Van der  
127 Auwera A. et al., 2013) to identify novel variants.

#### 128 **SNP and indel annotation and gene ontology analysis**

129 ANNOVAR (Wang et al., 2010) was used to annotate the functions of the variants (exonic, intronic,  
130 5' and 3' UTRs, splicing, intergenic) using Ensembl release 71. SNPs that were identified in the  
131 exonic regions were classified as synonymous or nonsynonymous SNPs. In recent studies, numerous  
132 phenotypes have been associated with the genes containing the highest number of nonsynonymous  
133 SNPs (nsSNPs) (Kawahara-Miki et al., 2011; Li et al., 2014). We performed gene ontology (GO)  
134 analysis for genes containing nsSNPs and indels using the GO Analysis Toolkit and Database for  
135 Agricultural Community (AgriGO) (Du et al., 2010). In this analysis, we selected genes containing  
136 >5 nsSNPs for each breed. The significantly enriched GO terms were assessed by Fisher's exact test  
137 with the Bonferroni correction using default parameters (P-value, 0.05; at least 5 mapping entries).  
138 Out of four indel classes (frameshift, nonframeshift, stopgain and stoploss), we annotated frameshift  
139 indels in exonic regions using default parameters in ANNOVAR. Frameshift indels may change  
140 amino acid sequences and thereby affect protein function.

#### 141 **Identification and annotation of selective sweeps**

142 We investigated the signatures of selection using site frequency spectrum (SFS)-based  $\alpha$  statistics in  
143 SweeD (Pavlidis et al., 2013) with default parameters, except setting the grid as the only parameter.  
144 SweeD detects the signature of selection based on the composite likelihood ratio test (CLR) using  
145 SFS-based statistics. SweeD was run separately for each chromosome by setting the grid parameter at  
146 5-kb equidistant positions across the chromosome (size of the chromosome/5 kb). We used BEAGLE  
147 program ver.4 (Browning and Browning, 2007) to impute missing alleles and infer the haplotype  
148 phase for all individual Western Finncattle, Yakutian cattle and Eastern Finncattle simultaneously  
149 (among the Eastern Finncattle, we excluded one inbred animal; see Results). The BEAGLE program  
150 infers the haplotype information of each chromosome, which is required for  $\alpha$  statistics. Following  
151 the approaches described in previous studies (Wang et al., 2014b; McManus et al., 2015), we selected  
152 the outliers falling within the top 0.5% of the CLR distribution. The cutoff value for  $\alpha$  statistics was

153 taken as the 99.5 percentile of the empirical distribution of the 5-kb equidistant positions across the  
154 genome for each chromosome. Annotation of the candidate sites that exhibited a signal of selection  
155 was performed using Ensembl BioMart (Kinsella et al., 2011) by considering a 150-kb sliding  
156 window on the outlier sites. Candidate genes exhibiting signatures of selection were subjected to GO  
157 analysis with same parameters applied in the variant annotation using AgriGO.

### 158 **Population genetics analysis**

159 The average pairwise nucleotide diversity within a population ( $\pi$ ) and the proportion of polymorphic  
160 sites (Watterson's  $\theta$ ) were computed using the Bio::PopGen::Statistics package in BioPerl (v1.6.924)  
161 (Stajich et al., 2002). Principal component analysis (PCA) was conducted using smartpca in  
162 EIGENSOFT3.0 software (Patterson et al., 2006) on biallelic autosomal SNPs that were genotyped in  
163 all individuals. Significant eigenvectors were determined using Tracy-Widom statistics with the  
164 twstats program implemented in the same EIGENSOFT package.

### 165 **Demographic history inference**

166 We used the pairwise sequentially Markovian coalescent (PSMC) model (Li and Durbin, 2011) to  
167 construct the demographic history of the three breeds. For the analysis, one individual per breed with  
168 highest sequence depth was selected to explore changes in local density of heterozygous sites across  
169 the cattle genome. The following default PSMC parameters were set:  $-N25$ ,  $-t15$ ,  $-r5$  and  $-p$   
170  $'4+25*2+4+6'$ . To scale the PSMC output to real time, we assumed a neutral mutation rate of  $1.1 \times$   
171  $10^{-8}$  per generation and an average generation time of 5 years (Kumar and Subramanian, 2002;  
172 Murray et al., 2010; MacLeod et al., 2013). As the power of the PSMC approach to reconstruct recent  
173 demographic history is not reliable (Li and Durbin, 2011; MacLeod et al., 2013; Zhao et al., 2013),  
174 we reconstructed a more recent demographic history of the Finnish and Yakutian populations using  
175 the diffusion approximation for demographic inference ( $\partial\text{adi}$ ) program (dadi-1.6.3) (Gutenkunst et



176 al., 2009). We used the intergenic sites from the identified SNPs in the 15 individuals to compute the  
177 folded SFS. We merged the results for the Eastern and Western Finncattle breeds, as these breeds  
178 exhibited similar genetic diversity measures (Figure S4). Since we had 10 Finncattle and 5 Yakutian  
179 samples, we downscaled the Finncattle sample size to be equal to that of the Yakutian cattle. We ran  
180 the  $\hat{\partial}a\hat{\partial}i$  algorithm multiple times to ensure convergence and selected the optimal parameters with the  
181 highest likelihood as the final result. As  $\hat{\partial}a\hat{\partial}i$  requires ancestral population size ( $N_a$ ), we calculated  
182  $N_a$  using the formula  $NA = \theta / 4\mu L$ , where  $\theta$  was the observed number of segregating sites divided by  
183 the sum of the expected SFS using the best-fit parameters of our model,  $L$  was the effective sequence  
184 length, and  $\mu$  was the mutation rate per generation per site. We used a mutation rate of  $1.0 \times 10^{-8}$   
185 mutations per generation assuming that one generation was equal to 5 years (Kumar and  
186 Subramanian, 2002), and the effective sequence length (intergenic regions) was 10,836,904. We  
187 calculated population size and divergence time between the Finnish and Yakutian populations based  
188 on  $N_a$ . Finally, using the parameters described previously, we generated the demographic model  
189 using  $\hat{\partial}a\hat{\partial}i$  as shown in Figure S5. The optimal model identified the change from the ancestral  
190 population size ( $N_a$ ) to the effective population size ( $n_{ua}$ ) from the time  $T_a$  to the time  $T_d$ .  $T_a$  was  
191 the time period when the change in  $N_a$  started and  $T_d$  was the time when the divergence between the  
192 Finnish and Yakutian cattle occurred.  $n_{u1F}$  and  $n_{u2Y}$  were the effective population sizes during the  
193 split. To calculate the statistical confidence in the estimated parameter values, we estimated the  
194 parameter uncertainties using the Hessian method (a.k.a. the Fisher information matrix).

## 195 **RESULTS**

### 196 **Sequence data**

197 A total of 521 gigabases (Gb) of paired-end DNA sequence data was obtained after removing adapter  
198 sequences and low-quality reads (Table 1, Table S1). On average, each sample had 347.4 million (M)

199 reads, 98.45% of which were successfully mapped to the bovine reference genome UMD3.1 (Table  
200 1, Table S1), representing 12.38-fold coverage.

## 201 **Identification and annotation of variants**

202 A total of 17.45 M SNPs were detected in the mapped reads across all 15 samples, with Yakutian  
203 cattle exhibiting the highest number of SNPs (Table 2, Figure 2a, Table S2). The average number of  
204 SNPs detected per individual within the breeds was 5.73 M, 6.03 M and 7.12 M in Eastern Finncattle,  
205 Western Finncattle and Yakutian cattle, respectively (Table S2). A total of 6.3 M (36.1%) SNPs were  
206 shared by the three breeds, and as expected, the Finnish breeds shared the highest number ( $n=8.06$  M,  
207 46.2%) of SNPs (Figure 1a). Moreover, we found that 1.85 M SNPs (16.83%) in Eastern Finncattle,  
208 1.60 M (15.15%) in Western Finncattle and 3.96 M (32.33%) in Yakutian cattle were private SNPs in  
209 our data (Figure 2a). The transition-to-transversion (TS/TV) ratios were 2.20 and 2.23 in the  
210 Finncattle and Yakutian cattle, respectively (Table S2). The observed Ts/Tv ratios were consistent  
211 with those observed in previous studies in mammalian systems (Lachance et al., 2012; Choi et al.,  
212 2013, 2014), indicating the quality of our SNP data.

213 Of the SNPs identified in our analysis, 1.28 M (6.9%) SNPs were found to be novel when compared  
214 to NCBI dbSNP bovine build 148. At the breed level, 3.1%, 2.8% and 5.3% of the total SNPs in the  
215 Eastern Finncattle, Western Finncattle and Yakutian cattle, respectively, were novel. Furthermore,  
216 out of the novel SNPs identified for each breed, 278,399 (82.57%), 235,741(80.72%) and 618,717  
217 (94.85%) were breed-specific SNPs in Eastern Finncattle, Western Finncattle and Yakutian cattle  
218 (Figure 2b), respectively. A summary of the homozygous and heterozygous SNPs is given in Tables  
219 S2 and S3. One Eastern Finncattle cow (sample\_3 in Table S3) exhibited exceptionally low diversity,  
220 with only 1.66 M (32.58%) heterozygous and 3.44 M (67.42%) homozygous SNPs. This animal  
221 originated from an isolated, inbred herd and represented one relict Eastern Finncattle line (herd) that

222 passed through the breed's demographic bottleneck (Kantanen et al., 2000). After excluding this  
223 sample, the average number of SNPs detected per Eastern Finncattle individual was 5.88 M, and the  
224 Eastern Finncattle animals exhibited 2.63 M (44.83%) homozygous and 3.24 M (55.17%)  
225 heterozygous SNPs, with a ratio of 1:1.23 (homozygous:heterozygous). Apparently, the number of  
226 homozygous SNPs in the Eastern Finncattle was higher than that in the other two breeds.

227 In total, we detected 2.12 M indels, 79.8% of which were found in the dbSNP build 148, with 20.2%  
228 being novel (Figure 2C, Table S2). At the breed level, 13.0%, 11.7% and 16.1% of the total indels in  
229 the Eastern Finncattle, Western Finncattle and Yakutian cattle, respectively, were novel.

230 In our data, on average, 0.65% of the SNPs were detected in exonic regions, 25.1% in intronic  
231 regions, 72.6% in intergenic regions, and 1.65% in UTRs and in regions upstream and downstream of  
232 genes (Table 2 and Table S4). In general, all the three breeds exhibited similar distributions of SNPs  
233 in various functional categories. A total of 76,810, 71,256 and 84,927 exonic SNPs were identified in  
234 the Eastern Finncattle, Western Finncattle and Yakutian cattle, respectively. Of the exonic SNPs in  
235 the Eastern Finncattle, Western Finncattle and Yakutian cattle, 31,299, 29,035 and 33,111,  
236 respectively, were nonsynonymous SNPs (nsSNPs) (Table 2) and were found in 10,309, 9,864 and  
237 10,429 genes, respectively.

238 The functional categories of the indel mutations are presented in Table 2 and Table S4. In total,  
239 1,045, 927 and 1,148 of the indels were frameshift indels that were associated with 808, 770 and 895  
240 genes in Eastern Finncattle, Western Finncattle and Yakutian cattle, respectively (Supplementary  
241 Data 1, 2 and 3).

242 **GO analysis of the SNPs and indels**

243 GO enrichment analysis of 1,331, 1,170 and 1,442 genes containing >5 nsSNPs (Supplementary Data  
244 4, 5 and 6), identified 111, 113 and 95 significantly enriched GO terms in Eastern Finncattle,  
245 Western Finncattle and Yakutian cattle, respectively (Supplementary Data 7, 8 and 9). A total of 38,  
246 43 and 38 GO terms were associated with biological processes in Eastern Finncattle, Western  
247 Finncattle and Yakutian cattle, respectively (Supplementary Data 7, 8, 9).

248 A detailed comparison of the biological processes associated with genes with >5 nsSNPs with the  
249 bovine Ensembl gene set (n=25,160) is shown in Figure S1. The GO enrichment analysis revealed  
250 that a majority of the significantly enriched GO terms were shared by the three cattle breeds.  
251 “Response to stimulus, GO:00050896” was associated with approximately 50% of the genes in  
252 Eastern Finncattle (n=611), Western Finncattle (n =544) and Yakutian cattle (n=629) (see Figure S1).  
253 In addition, this analysis showed that in each breed, a large number of genes were associated with  
254 immune functions, such as “Immune response, GO:0006955”, “Defense response, GO:0006952”,  
255 “Antigen processing and presentation, GO:0019882”, and “Immune system process, GO:0002376”.  
256 Among the three breeds, the Yakutian cattle had more enriched genes associated with immune  
257 functions than the two Finncattle breeds. On the other hand, in the Finncattle breeds, a large number  
258 of genes were associated with sensory perception functions, such as “Sensory perception,  
259 GO:0007600”, “Sensory perception of smell, GO:0007608” and “Detection of chemical stimulus  
260 involved in sensory perception, GO:0050907”. In Yakutian cattle, none of the GO terms associated  
261 with sensory perception were enriched. However, 55 genes associated with “Developmental growth,  
262 GO: 0048589” were enriched in only Yakutian cattle.

263 We further identified the top genes, namely, *TTN*, *PKHD1*, *GPR98* and *ASPM*, that had at least 40  
264 nsSNPs in all the breeds. These genes have large sizes; *TTN* is 274 kb in size, *PKHD1* is 455 kb,  
265 *GPR98* is 188 kb and *ASPM* is 64 kb. Among the genes with nsSNPs, *TTN* contained the highest  
266 number of nsSNPs: 68, 63 and 87 nsSNPs in Eastern Finncattle, Western Finncattle and Yakutian

267 cattle, respectively. The *TTN* gene is present on chromosome 2 and is associated with meat quality  
268 (Sasaki et al., 2006; Watanabe et al., 2011).

269 A total of 709, 675 and 772 genes associated with frameshift indels in these breeds were linked to at  
270 least one GO term (Figure S2, Supplementary Data 10, 11 and 12). The results indicated that a  
271 majority of the significantly enriched GO terms were shared by the breeds. The GO terms “Defense  
272 response, GO:0006952” and “Female pregnancy, GO:0007565” were enriched exclusively in  
273 Yakutian cattle. In total, 96 genes were enriched in “Defense response, GO:0006952”.

#### 274 **Selection signatures**

275 We identified 2,528 sites exhibiting signatures of selection in each breed, of which 58%, 61% and  
276 53% mapped to gene regions in Eastern Finncattle, Western Finncattle and Yakutian cattle,  
277 respectively (Figure S3). Information regarding the SNPs found in selective sweep regions in each  
278 breed is shown in Table S5.

279 Chromosome 1 exhibited the highest (n=159) number of selection signals and chromosome 25 the  
280 lowest (n=43). Considering a 150-kb window centered on the candidate site, Western Finncattle  
281 exhibited the highest number (n=371) of candidate genes with selection signatures, followed by  
282 Eastern Finncattle (n=331), while Yakutian cattle exhibited the lowest number (n=249)  
283 (Supplementary Data 13, 14 and 15). Apparently, 36 (Eastern Finncattle), 35 (Western Finncattle)  
284 and 20 (Yakutian cattle) candidate gene IDs lacked gene descriptions (Supplementary Data 16, 17  
285 and 18). Seven genes with greater than 5 nsSNPs in Eastern Finncattle (*CCSAP*, *CEP72*, *GBP5*,  
286 *LOC100297846*, *GBP2*, *LOC613867* and ENSBTAG00000045571), Western Finncattle (*CDH23*,  
287 *PCDHB4*, *PCDHB6*, *PCDHB7*, *SIRPB1*, *LOC783488* and ENSBTAG00000012326) and Yakutian  
288 cattle (*FER1L6*, *GBP5*, ENSBTAG00000015464, ENSBTAG00000025621, *GBP2*,  
289 ENSBTAG00000039016 and *LOC101902869*) exhibited the strongest signatures of selection. Of the

290 genes with the strongest signatures of selection, one gene each from Eastern  
291 (ENSBTAG00000045571) and Western Finncattle (ENSBTAG00000012326) and three genes from  
292 Yakutian cattle (ENSBTAG00000015464, ENSBTAG00000025621, ENSBTAG00000039016)  
293 lacked gene descriptions (Table S6).

294 A total of 28, 67 and 13 GO terms were significantly enriched in Eastern Finncattle, Western  
295 Finncattle and Yakutian cattle, respectively (Supplementary Data 19, 20 and 21). We found only one  
296 significantly enriched GO term ("GMP binding, GO:0019002") that was shared by the three cattle  
297 breeds. The GO terms "Homophilic cell adhesion, GO:0007156", "Calcium-dependent cell-cell  
298 adhesion,GO:0016339" and "Multicellular organism reproduction, GO:0032504" were shared by the  
299 Finncattle breeds. Most of the significantly enriched GO terms (23, 62 and 12 in Eastern Finncattle,  
300 Western Finncattle and Yakutian cattle, respectively) were 'breed-specific' in our data. In addition,  
301 we examined the significantly enriched GO terms that were potentially involved in cold adaptation  
302 by assuming that in extremely cold environments, energy requirement is high and fat and lipids are  
303 the main sources of energy (Liu et al., 2014). The levels of fatty acids, lipids and phospholipids  
304 typically increase with decreasing temperatures (Purać et al., 2011). The significantly enriched GO  
305 terms associated with Western Finncattle included "Lipid localization, GO:0010876", "Lipid  
306 digestion, GO:0044241", "Unsaturated fatty acid biosynthetic process, GO:0006636" and  
307 "Unsaturated fatty acid metabolic process, GO:0033559 ". However, no significantly enriched GO  
308 terms associated with fatty acid and lipid metabolism and biosynthesis were identified in Eastern  
309 Finncattle and Yakutian cattle.

310 We examined the candidate selective sweep genes in each breed. A number of genes potentially  
311 associated with cold adaptation (Cardona et al., 2014) were present in Eastern Finncattle (*DNAJC28*,  
312 *HSP90B1*, *AGTRAP*, *TAF7*, *TRIP13*, *NPPA* and *NPPB*), Western Finncattle (*CD14*, *COBL*,

313 *JMJD1C, KCNMA1, PLA2G4, SERPINF2, SRA1* and *TAF7*) and Yakutian cattle (*DNAJC9, SOCS3,*  
314 *TRPC7, SLC8A1, GLP1R, PKLR* and *TCF7L2*).

315 Among the selective sweep genes, there were several genes that have been previously shown to be  
316 associated with domestication-related changes, such as changes in disease resistance, neuronal and  
317 brain development, growth, meat quality, pigmentation, sensory perception and milk production  
318 (Gutiérrez et al., 2015). For example, the chromosomal regions exhibiting selective sweeps in  
319 Eastern Finncattle included genes associated with disease resistance (*IFNAR1, IFNAR2, IL10RB* and  
320 *NOD2*), neuronal and brain development (*OLIG1*), growth (*ACTA1*) and meat quality (*IGFBP5,*  
321 *NRAP, PC* and *SIPRI*) (Supplementary Data 13). In Western Finncattle, selective sweeps were  
322 detected in genes associated with pigmentation (*ULBP3*), sensory perception (*LOC521946,*  
323 *LOC783558* and *LOC783323*), meat quality (*COX5B, KAT2B* and *ITGB3*) and disease resistance  
324 (*CD96, CD14, GZMB* and *IL17A*) (Supplementary Data 14). Similarly, selective sweep-influenced  
325 genes in Yakutian cattle were associated with disease resistance (*PFKM, ADAMI7* and *SIRPA*),  
326 sensory perception (*OR13C8, LOC100336881, LOC101902265, LOC512488, LOC617388,*  
327 *LOC783884, LOC788031* and *LOC789957*), meat quality (*ALDH1B1, CAPNS1, COX7A1, PFKM,*  
328 *SLC8A1, SOCS3* and *THBS3*) and milk production (*MUC1*) (Supplementary Data 15).

### 329 **Population genetics analysis**

330 The overall genome-wide genetic diversity, as measured by Watterson's  $\theta$  and pairwise nucleotide  
331 diversity ( $\pi$ ), were higher in the Yakutian cattle (0.001588 and  $1.728 \times 10^{-3}$ , respectively) than in  
332 Eastern Finncattle (0.001445 and  $1.559 \times 10^{-3}$ , respectively) and Western Finncattle (0.001398 and  
333  $1.512 \times 10^{-3}$ , respectively), and these results were inconsistent with those of previous studies based  
334 on autosomal microsatellite and SNP data sets, which showed that Finncattle were more diverse than  
335 the Yakutian cattle (Li and Kantanen, 2010).



336 We also applied PCA to examine the genetic relationships among the three cattle breeds. In the PCA  
337 plot, the Finncattle and Yakutian cattle were grouped in the first eigenvectors, indicating clear  
338 genetic differentiation (Figure S4). The inbred Eastern Finncattle animal grouped separately from the  
339 other Finncattle animals.

#### 340 **Demographic population size history**

341 The PSMC profiles of the contemporary Finnish and Siberian native cattle were used to construct the  
342 demographic prehistory and evolution of ancestral populations of northern Eurasian cattle. As shown  
343 in Figure 3, the temporal PSMC profiles of the three cattle genomes followed a similar pattern. The  
344 ancestral species of northern Eurasian taurine cattle, the near-eastern aurochs (*Bos primigenius*)  
345 (Kantanen et al., 2009a), experienced two population peaks starting at ~1 Mya and ~40 kya and two  
346 bottlenecks at ~250 kya and ~12 kya (Figure 3). After the first population expansion, the population  
347 size declined gradually. The second population expansion of the ancestral wild species began around  
348 ~80 kya and started to decline around ~30 kya, leading to a second bottleneck.

349 We also used the  $\partial a\partial i$  program to reconstruct the recent northern European cattle demographic  
350 history (from 418 kya to the present). The parameters  $T_a$ ,  $T_d$ ,  $n_{ua}$ ,  $n_{u1F}$  and  $n_{u2Y}$  in the  
351 demographic model are shown and explained in Figure S5 and Table S7. Based on this model, we  
352 estimated that the reference ancestral population size (NA) was 43,116. The optimal model fit for  
353 each parameter and confidence interval (CI) are shown in Table S7 by fixing NA at 43,116 and  
354 generation time at 5 years. Our best-fit model indicated that the ancestral population underwent a size  
355 change to 51,883 (CI, 51,658-52,108) at 418 kya (95% CI, 413.96-409.47 kya) (Table S7). This  
356 result is consistent with the PSMC profile (Figure 3). In addition, our model suggested that the  
357 divergence of North European native cattle and East Siberian turano-mongolicus type of cattle  
358 occurred 8,822 years ago (CI, 8,775-8,869 years ago).



359 **DISCUSSION**

360 To our knowledge, this is the first whole-genome sequence-based report on the genetic diversity of  
361 Eurasian native cattle (*B. taurus*) breeds that have adapted to the northernmost cattle farming regions,  
362 even subarctic regions. The contemporary genetic resources of the Eastern Finncattle, Western  
363 Finncattle and Yakutian cattle breeds studied are the result of a complex process of genetic and  
364 demographic events that occurred during the domestication and selection and even the evolution of  
365 the ancestral species of northern Eurasian taurine cattle, namely, the near-eastern aurochs (*B.*  
366 *primigenius*).

367 **Demographic evolution of *Bos primigenius***

368 As shown in Figure 3, the auroch species (*B. primigenius*) experienced two notable prehistorical  
369 population expansions, after which the population size declined gradually. The first marked decline  
370 in the effective population size ( $N_e$ ) occurred during the Middle Pleistocene period starting after ~1  
371 Mya, which may have been associated with reduction in global temperatures and even with negative  
372 actions of humans on the auroch population (Barnosky et al., 2004; Hughes et al., 2007). The second  
373 marked decline in  $N_e$  prior to domestication was obviously caused by dramatic climate changes  
374 during the last glacial maximum (Yokoyama et al., 2000). Although the sequencing depth attained in  
375 this study was not ideal for PSMC analysis (typically  $>20\times$ ), our observations regarding the temporal  
376 changes in the  $N_e$  of the aurochs during the Pleistocene period (Mei et al., 2018) followed the pattern  
377 observed for ancestral populations of several other domestic mammalian species, such as pig (*Sus*  
378 *scrofa*; (Groenen et al., 2012)), horse (*Equus caballus*; (Librado et al., 2016)) and sheep (*Ovis aries*;  
379 (Yang et al., 2016)). The  $\hat{\delta}a\hat{\delta}i$  results confirmed the past fluctuations in the prehistorical  $N_e$  of *B.*  
380 *primigenius* (Table S7), and the comparison of the current SNP-based estimated  $N_e$  of the present  
381 cattle breeds (~100; (Iso-Touru et al., 2016)) to the  $N_e$  of the corresponding early domesticated

382 ancestral populations showed that there was a dramatic decline in the  $N_e$  during domestication and  
383 breed formation. In addition, our demographic analysis (Figure S5) provided new knowledge of the  
384 prehistory of northern Eurasian native cattle. As suggested by a previous study (Kantanen et al.,  
385 2009b), both the Finnish and Yakutian native cattle descended from the near-eastern aurochs  
386 domesticated 8,000-10,000 years ago. Here, our results have shown that the two northern Eurasian  
387 native cattle lineages may have already diverged in the early stage of taurine cattle domestication,  
388 more than 8,000 years ago.

### 389 **High genetic variability in the Yakutian cattle**

390 The total number of sequence variants identified on average in Eastern Finncattle and Western  
391 Finncattle animals (e.g., 5.88 M and 6.03 M SNPs, respectively, exhibiting a minor allele frequency  
392  $> 0.05$ ) corresponded well to numbers found typically in European taurine animals. In contrast, we  
393 found that the Yakutian cattle exhibited a higher number of SNPs on average per individual (7.12 M  
394 SNPs) than the number of SNPs detected in European and Asiatic humpless cattle to date (Tsuda et  
395 al., 2013; Choi et al., 2014; Szyda et al., 2015). According to (Szyda et al., 2015) and studies cited  
396 therein, a European taurine animal may exhibit on average 2.06-6.12, 5.89-6.37, 5.85-6.40 and 5.93  
397 M SNPs, while (Choi et al., 2014) detected 5.81M SNPs in a Korean Holstein cattle individual, a  
398 breed that originated from western Europe and North America. Typically, it may be possible to detect  
399 additional SNPs by increasing the sequencing depth (Szyda et al., 2015). In addition to the average  
400 number of SNPs per individual, total number of SNPs and number of indels, the Yakutian cattle  
401 exhibited the highest number of exonic SNPs and nsSNPs among the three northern native breeds  
402 studied. However, although the Yakutian cattle had the highest number of nsSNPs and genes with  $>5$   
403 nsSNPs, the functional annotation of the exonic SNPs by GO analysis indicated that the lowest  
404 number of significantly enriched GO terms was obtained for the Yakutian cattle.

405 Our estimates for the population-level diversity for the Eastern Finncattle, Western Finncattle and  
406 Yakutian cattle (the nucleotide diversity ( $\pi$ ) values were  $1.559 \times 10^{-3}$ ,  $1.512 \times 10^{-3}$  and  $1.728 \times 10^{-3}$ ,  
407 3, respectively, and the proportions of polymorphic sites ( $\theta$ ) were 0.001445, 0.001398 and 0.001588,  
408 respectively) exceed those typically found in European taurine cattle breeds (Kim et al., 2017; Chen  
409 et al., 2018; Mei et al., 2018). We observed that Yakutian cattle such as the Asiatic taurine cattle  
410 breeds exhibit high levels of genomic diversity in terms of  $\pi$  and  $\theta$  estimates. The typical nucleotide  
411 diversity values for the European taurine cattle are  $>1.0 \times 10^{-3}$ , while those for the Asiatic taurine  
412 breeds are closer to  $\sim 2.0 \times 10^{-3}$  than to  $1.0 \times 10^{-3}$  (Kim et al., 2017; Chen et al., 2018; Mei et al.,  
413 2018). We observed higher within-population diversity for the Yakutian cattle than that observed for  
414 several other taurine cattle breeds, which differs from previous estimates based on autosomal  
415 microsatellites and whole-genome SNP data (Li et al., 2007; Iso-Touru et al., 2016), where lower  
416 levels of variation were observed in Yakutian cattle, indicating that the genetic variation in Yakutian  
417 cattle has been underestimated. The set of autosomal microsatellites recommended by FAO (the Food  
418 and Agricultural Organization of the United Nations) for biodiversity analysis of cattle breeds and the  
419 design of commercial SNP BeadChips used in cattle whole-genome genotyping were derived mainly  
420 from the genetic data of western breeds, causing a bias in the diversity estimates of clearly  
421 genetically distinct cattle breeds, such as Yakutian cattle (Li et al., 2007; Iso-Touru et al., 2016).

422 There could have been differences in the past effective population sizes of the European and Asiatic  
423 taurine cattle, and the present elevated genomic diversity of the Asiatic taurine cattle breeds may  
424 reflect the higher “ancient” effective sizes of the ancestral populations of the Asiatic taurine breeds  
425 (Chen et al., 2018). However, the prehistory of domesticated cattle in East Asia appears to be more  
426 complex than previously thought (Zhang et al., 2013; Gao et al., 2017; Chen et al., 2018), and an  
427 additional speculative explanation for the elevated genomic diversity in the Yakutian cattle and  
428 several other Asiatic taurine cattle breeds (or their ancestral populations) could be ancient

429 introgression with the East Asian aurochs (*B. primigenius*) that lived in the East Asian region during  
430 the arrival of near-eastern taurine cattle (Chen et al., 2018). The previous mtDNA and Y-  
431 chromosomal diversity study indicated the near-eastern origins of the ancestral population of the  
432 Yakutian cattle (Kantanen et al., 2009b). The possible hybrid origins of the Yakutian cattle ancestries  
433 may have increased the genetic variation in the ancestral population of Yakutian cattle seen even in  
434 the current population and may have played a pivotal role in the process of adaptation of the  
435 Yakutian cattle to the subarctic environment in the Sakha Republic, eastern Siberia.

436 The high number of SNPs and high genomic diversity found in the Yakutian cattle may be due partly  
437 to the breed's selection history: the artificial selection by humans has not been intensive (Kantanen et  
438 al., 2009b). The Yakutian cattle breed is an aboriginal taurine population, the gene pool of which has  
439 been shaped by natural and artificial selection. However, the centuries-old "folk selection" methods  
440 and traditional knowledge for the selection of the most suitable animals for the challenging subarctic  
441 environment followed the methods used by local people rather than the breeding implemented by  
442 organizations or institutions (Kantanen et al., 2009a). When compared with the Western Finncattle  
443 and Eastern Finncattle in the present study, the Yakutian cattle exhibited distinctly low numbers of  
444 candidate genes that exhibited selection signatures (n=371, n=331 and n=249, respectively). Among  
445 these three breeds, Western Finncattle have been subjected to the most intensive artificial selection  
446 for milk production characteristics, while the production selection program of Eastern Finncattle was  
447 stopped in the 1960s, when the census population size of this native breed declined rapidly.

448 Currently, *in vivo* and *in vitro* conservation activities are being implemented for Eastern Finncattle  
449 (and for Western Finncattle and Yakutian cattle). In addition, although Yakutian cattle had the  
450 highest number of genes containing SNPs (also nsSNPs) among the three breeds, the GO analysis  
451 indicated that this breed had the lowest number of significantly enriched GO terms (Eastern  
452 Finncattle, 111; Western Finncattle, 113; and Yakutian cattle, 95). This difference between the native

453 Finnish cattle and Yakutian cattle can be due to the differences in the selection histories of these  
454 breeds.

#### 455 **Genomic characteristics of the northern Eurasian taurine cattle breeds**

456 The GO enrichment analysis of genes harboring >5 nsSNPs indicated that genes related, e.g., to  
457 immunity and “response to stimulus” are overrepresented in the set of genes identified in the northern  
458 Eurasian native cattle breeds in this study. “Response to stimulus” refers to a change in the state or  
459 activity of a cell or an organism as a result of the detection of a stimulus, e.g., a change in enzyme  
460 production or gene expression (Gene Ontology Browser). This observation was consistent with  
461 previous cattle resequencing analyses (Choi et al., 2014; Stafuzza et al., 2017; Mei et al., 2018) and  
462 suggests that these genes were under positive selection during the course of cattle evolution and  
463 provided survival benefits, e.g., during environmental changes (Nielsen et al., 2007). Interestingly,  
464 genes related to the GO term “Sensory perception” were enriched in Eastern Finncattle and Western  
465 Finncattle but not Yakutian cattle. We performed a manual search for genes associated with “Sensory  
466 perception” genes. We found that 47 of these genes exhibited >5 nsSNPs in Eastern Finncattle and  
467 Western Finncattle, most of which were olfactory receptor genes. We determined the number of  
468 SNPs and nucleotide diversity of this set of genes and found that the Yakutian cattle exhibited less  
469 variation than the two Finnish native breeds (the number of SNPs and  $\pi$ -estimates for Eastern  
470 Finncattle, Western Finncattle and Yakutian cattle were 2,298 and  $1.864 \times 10^{-3}$ ; 2,091 and  $1.792 \times$   
471  $10^{-3}$ ; 1,478 and  $1.113 \times 10^{-3}$ , respectively), which is in contrast to the number of SNPs and  $\pi$ -  
472 estimates obtained for the entire genomes of the breeds. Great variations in the number of olfactory  
473 receptor genes and structural variations in these genes among mammalian species and even  
474 individuals within species (e.g., in humans) have been interpreted as reflecting the effects of  
475 environmental factors on the genetic diversity of this multigene family and demonstrate the  
476 importance of these genes from the evolutionary point of view (Niimura, 2011; Niimura et al., 2014).

477 Therefore, we hypothesize that the reduced genetic diversity in the evolutionarily important genes in  
478 Yakutian cattle could be associated with gradual adaptation to the challenging subarctic environment  
479 along with human movements from the southern Siberian regions to more northern environment  
480 (Librado et al., 2015). Cattle (and horses) may have been introduced to the Yakutian region after the  
481 9th century, perhaps as late as the 13th century (Kopoteva and Partanen, 2009). Compared to  
482 European taurine cattle, this is a relatively short time period in terms of intervals between cattle  
483 generations. In our study, genes related to the GO term “Developmental growth” were enriched in  
484 only Yakutian cattle. (Stothard et al., 2011) suggested that genes associated with the GO term  
485 “Growth” may be related to the increase in the mass of intensively selected Black Angus (beef breed)  
486 and Holstein (dairy breed) cattle. However, Yakutian cattle have not been selected for increased body  
487 size as that would be less desirable characteristic in Yakutian conditions. Instead, we hypothesize that  
488 the enrichment of these growth-related genes in Yakutian cattle may be a signature of adaptation to  
489 the harsh environment. The Yakutian cattle exhibit unique morphoanatomical adaptations to the  
490 subarctic climate and are characterized by their small live weights (adult cows typically weigh 350-  
491 400 kilograms, with heights of 110-112 centimeters); deep but relatively narrow chests; and short,  
492 firm legs (Kantanen et al., 2009a). The Yakutian cattle are unique remnants of the Siberian Turano-  
493 Mongolian type of taurine cattle (Kantanen et al., 2009a) and can be distinguished from the European  
494 humpless cattle by these anatomical characteristics.

495 We performed genome-wide selection-mapping scans for the three northern cattle breeds and found a  
496 great majority of SNPs exhibiting selection signatures in noncoding genomic regions. This finding  
497 indicates that selection occurs specifically via the regulatory elements of genomes (see also (Librado  
498 et al., 2015)). We found that the studied breeds exhibited ‘private’ (breed-specific) selection  
499 signature patterns, indicating distinctiveness in their selection histories. We further investigated the  
500 proportions of genes exhibiting selection signatures among the breeds and found that only 5 genes

501 from this set of genes were shared by the three breeds. Only 37 genes were shared by the two Finnish  
502 native cattle breeds, while 13 ‘selection signature’ genes were shared by Western Finncattle and  
503 Yakutian cattle and 11 by Eastern Finncattle and Yakutian cattle. In addition, the breeds did not share  
504 any of the genes exhibiting the strongest selection signatures and harboring >5 nsSNPs, and the GO  
505 term enrichment analysis of this set of genes indicated that only one GO term (“GMP binding”) was  
506 significantly enriched in all three breeds.

507 We identified several positively selected candidate genes underlying adaptation, appearance and  
508 production of Eastern Finncattle, Western Finncattle and Yakutian cattle. For example, in Eastern  
509 Finncattle, selection signatures were detected in *NRAP* and *IGFBP5*, both of which have been  
510 previously identified as candidate genes for muscle development and meat quality in cattle (Williams  
511 et al., 2009), and in *NOD2*, which is a candidate gene for dairy production (Ogorevc et al., 2009). In  
512 Western Finncattle, we detected selection signatures in, e.g., candidate genes for beef production,  
513 such as *COX5B* and *ITGB3* (Williams *et al.*, 2009), and dairy production, such as *CD14* (Ogorevc et  
514 al., 2009). In Yakutian cattle, several genes exhibiting selection signatures were candidate genes for  
515 muscle development and meat quality, such as *COX7A1*, *THBS3*, *PFKM*, and *SOCS3* (Williams *et*  
516 *al.*, 2009) but also for color pattern (*ADAM17*; (Gutiérrez-Gil et al., 2015)) and milk production traits  
517 (*MUC1*; (Ogorevc et al., 2009)). We were particularly interested in the genomic adaptation to North  
518 Eurasian environments. (Cardona et al., 2014) listed in the supplementary materials of their  
519 publication several potential candidate genes associated with biological processes and pathways  
520 hypothesized to be involved in cold adaptation in indigenous Siberian human populations in terms of  
521 response to temperature, blood pressure, basal metabolic rate, smooth muscle contraction and energy  
522 metabolism. Several of these genes also exhibited significant selection signatures in our cattle  
523 sequence data, as exemplified in the Results section of this paper. *SLC8A1* (sodium/calcium  
524 exchanger 1), influencing the oxidative stress response, is an example of the genes with significant



525 selection signatures in Yakutian cattle, Siberian human populations (Cardona et al., 2014) and native  
526 Yakutian horses (Librado et al., 2015). This example of selection signatures and associated genes  
527 found in the Yakutian cattle and Siberian human populations (Cardona et al., 2014) indicates  
528 convergent evolution between the mammalian populations adapted to subarctic environments.  
529 Convergent evolution between mammalian species in adaptation to harsh environments has also  
530 occurred, e.g., on the Tibetan plateau, as indicated by (Wang et al., 2014a, 2015; Yang et al., 2016).

## 531 **CONCLUSIONS**

532 We have investigated by whole-genome sequencing for the first time the genetic diversity of native  
533 cattle breeds originating from the northernmost region of cattle farming in the world. We found novel  
534 SNPs and indels and genes that have not yet been annotated. Our observations suggest that accurate  
535 reference genome assemblies are needed for genetically diverse native cattle breeds showing genetic  
536 distinctiveness, such as Yakutian cattle, in order to better understand the genetic diversity of the  
537 breeds and the effects of natural and artificial selection and adaptation. We identified a number of  
538 genes and chromosomal regions important for the adaptation and production traits of the breeds.  
539 Moreover, GO terms such as defense response, growth, sensory perception and immune response  
540 were enriched in the genes associated with selective sweeps. To improve our knowledge of the value  
541 of native breeds as genetic resources for future cattle breeding and the power of selection signature  
542 analyses, a greater number of animals of these breeds should be investigated in a wider breed  
543 diversity context.

## 544 **ABBREVIATIONS**

545 nsSNPs: nonsynonymous SNPs; GO: gene ontology; CLR: composite likelihood ratio; SFS: site  
546 frequency spectrum; PCA: principal component analysis; PSMC: pairwise sequentially Markovian  
547 coalescent;  $\hat{\alpha}\hat{\alpha}$ i: diffusion approximation for demographic inference; Gb: gigabases



548 **DATA AVAILABILITY**

549 The raw sequence reads (Fastq Files) for this study can be found in European Nucleotide Archive  
550 (ENA) under the accession number PRJEB28185 (please see Table S1 for sample specific  
551 accessions).

552 **AUTHOR CONTRIBUTIONS**

553 JK designed the study, and revised the manuscript. MW performed the bioinformatics and statistical  
554 analyses and drafted the manuscript. JK, RP, IA and ZI collected the samples. RP, KP, IA, MY and  
555 ZI participated in the experimental design and paper revision. All authors read and approved the final  
556 manuscript.

557 **FUNDING**

558 This work was supported by the Academy of Finland (the Arctic Ark—project no. 286040 in the  
559 ARKTIKO research program of the Academy of Finland), the Ministry of Agriculture and Forestry  
560 in Finland, and the Finnish Cultural Foundation. MW was partly supported by grants from the Betty  
561 Väänänen Foundation and Ella and Georg Ehrnrooth foundation, Doctoral School of University of  
562 Eastern Finland in Environmental Physics, Health and Biology.

563 **ACKNOWLEDGMENTS**

564 We thank Tuula-Marjatta Hamama for DNA extraction and BGI for sequencing the samples. The  
565 authors wish to acknowledge the CSC-IT Center for Science, Finland, for computational resources.  
566 The owners of the animals included in the study are acknowledged for providing samples for this  
567 study.

568 **REFERENCES**

- 569 Alachiotis, N., Stamatakis, A., and Pavlidis, P. (2012). OmegaPlus: a scalable tool for rapid detection  
570 of selective sweeps in whole-genome datasets. *Bioinformatics* 28, 2274–2275.  
571 doi:10.1093/bioinformatics/bts419.
- 572 Barnosky, A. D., Koch, P. L., Feranec, R. S., Wing, S. L., and Shabel, A. B. (2004). Assessing the  
573 Causes of Late Pleistocene Extinctions on the Continents. *Science* (80-. ). 306, 70. Available at:  
574 <http://science.sciencemag.org/content/306/5693/70.abstract>.
- 575 Bläuer, A., and Kantanen, J. (2013). Transition from hunting to animal husbandry in Southern,  
576 Western and Eastern Finland: new dated osteological evidence. *J. Archaeol. Sci.* 40, 1646–1666.  
577 doi:<http://dx.doi.org/10.1016/j.jas.2012.10.033>.
- 578 Boettcher, P. J., Tixier-Boichard, M., Toro, M. A., Simianer, H., Eding, H., Gandini, G., et al. (2010).  
579 Objectives, criteria and methods for using molecular genetic data in priority setting for  
580 conservation of animal genetic resources. *Anim. Genet.* 41, 64–77. doi:10.1111/j.1365-  
581 2052.2010.02050.x.
- 582 Browning, S. R., and Browning, B. L. (2007). Rapid and Accurate Haplotype Phasing and Missing-  
583 Data Inference for Whole-Genome Association Studies By Use of Localized Haplotype  
584 Clustering. *Am. J. Hum. Genet.* 81, 1084–1097. Available at:  
585 <http://www.ncbi.nlm.nih.gov/pmc/articles/PMC2265661/>.
- 586 Cardona, A., Pagani, L., Antao, T., Lawson, D. J., Eichstaedt, C. A., Yngvadottir, B., et al. (2014).  
587 Genome-Wide Analysis of Cold Adaptation in Indigenous Siberian Populations. *PLoS One* 9,  
588 e98076. doi:10.1371/journal.pone.0098076.
- 589 Chen, N., Cai, Y., Chen, Q., Li, R., Wang, K., Huang, Y., et al. (2018). Whole-genome resequencing  
590 reveals world-wide ancestry and adaptive introgression events of domesticated cattle in East

- 591 Asia. *Nat. Commun.* 9, 2337. doi:10.1038/s41467-018-04737-0.
- 592 Choi, J.-W., Liao, X., Park, S., Jeon, H.-J., Chung, W.-H., Stothard, P., et al. (2013). Massively  
593 Parallel Sequencing of Chikso (Korean Brindle Cattle) to Discover Genome-Wide SNPs and  
594 InDels. *Mol. Cells* 36, 203–211. doi:10.1007/s10059-013-2347-0.
- 595 Choi, J.-W., Liao, X., Stothard, P., Chung, W.-H., Jeon, H.-J., Miller, S. P., et al. (2014). Whole-  
596 Genome Analyses of Korean Native and Holstein Cattle Breeds by Massively Parallel  
597 Sequencing. *PLoS One* 9, e101127. Available at:  
598 <http://dx.doi.org/10.1371/journal.pone.0101127>.
- 599 Cramp, L. J. E., Jones, J., Sheridan, A., Smyth, J., Whelton, H., Mulville, J., et al. (2014). Immediate  
600 replacement of fishing with dairying by the earliest farmers of the northeast Atlantic  
601 archipelagos. *Proc. R. Soc. B Biol. Sci.* 281, 20132372. doi:10.1098/rspb.2013.2372.
- 602 DePristo, M. A., Banks, E., Poplin, R. E., Garimella, K. V., Maguire, J. R., Hartl, C., et al. (2011). A  
603 framework for variation discovery and genotyping using next-generation DNA sequencing data.  
604 *Nat. Genet.* 43, 491–498. doi:10.1038/ng.806.
- 605 Du, Z., Zhou, X., Ling, Y., Zhang, Z., and Su, Z. (2010). agriGO: a GO analysis toolkit for the  
606 agricultural community. *Nucleic Acids Res.* 38, W64–W70. doi:10.1093/nar/gkq310.
- 607 Egorov, E. G., Nikiforov, M. M., and Danilov, Y. G. (2015). Unique experience and achievements of  
608 sakha people in development of agriculture in the north. 9.
- 609 Felius, M. (1995). *Cattle Breeds, an Encyclopedia; Misset Uitgeverij: Doetinchem, The Netherlands.*
- 610 Flicek, P., Ahmed, I., Amode, M. R., Barrell, D., Beal, K., Brent, S., et al. (2013). Ensembl 2013.  
611 *Nucleic Acids Res.* 41, D48–D55. doi:10.1093/nar/gks1236.

- 612 Gao, Y., Gautier, M., Ding, X., Zhang, H., Wang, Y., Wang, X., et al. (2017). Species composition  
613 and environmental adaptation of indigenous Chinese cattle. *Sci. Rep.* 7, 16196.  
614 doi:10.1038/s41598-017-16438-7.
- 615 Groenen, M. A. M., Archibald, A. L., Uenishi, H., Tuggle, C. K., Takeuchi, Y., Rothschild, M. F., et  
616 al. (2012). Analyses of pig genomes provide insight into porcine demography and evolution.  
617 *Nature* 491, 393–398. doi:10.1038/nature11622.
- 618 Gutenkunst, R. N., Hernandez, R. D., Williamson, S. H., and Bustamante, C. D. (2009). Inferring the  
619 Joint Demographic History of Multiple Populations from Multidimensional SNP Frequency  
620 Data. *PLoS Genet* 5, e1000695. Available at:  
621 <http://dx.doi.org/10.1371/journal.pgen.1000695>.
- 622 Gutiérrez-Gil, B., Arranz, J. J., and Wiener, P. (2015). An interpretive review of selective sweep  
623 studies in *Bos taurus* cattle populations: identification of unique and shared selection signals  
624 across breeds. *Front. Genet.* 6, 167. Available at:  
625 <https://www.frontiersin.org/article/10.3389/fgene.2015.00167>.
- 626 Hughes, P. D., Woodward, J. C., and Gibbard, P. L. (2007). Middle Pleistocene cold stage climates in  
627 the Mediterranean: New evidence from the glacial record. *Earth Planet. Sci. Lett.* 253, 50–56.  
628 doi:<https://doi.org/10.1016/j.epsl.2006.10.019>.
- 629 Iso-Touru, T., Tapio, M., Vilkki, J., Kiseleva, T., Ammosov, I., Ivanova, Z., et al. (2016). Genetic  
630 diversity and genomic signatures of selection among cattle breeds from Siberia, eastern and  
631 northern Europe. *Anim. Genet.* 47, 647–657. doi:10.1111/age.12473.
- 632 Kantanen, J., Ammosov, I., Li, M., Osva, A., and Popov, R. (2009a). “A cow of the permafrost,” in  
633 *Sakha Ynaga* □: *cattle of the Yakuts* (Helsinki: Suomalaisen tiedeakatemian toimituksia), 19–44.

- 634 Kantanen, J., Edwards, C. J., Bradley, D. G., Viinalass, H., Thessler, S., Ivanova, Z., et al. (2009b).  
635 Maternal and paternal genealogy of Eurasian taurine cattle (*Bos taurus*). *Heredity (Edinb)*. 103,  
636 404–415. Available at:  
637 <http://www.nature.com/hdy/journal/v103/n5/supinfo/hdy200968s1.html>.
- 638 Kantanen, J., Låvendahl, P., Strandberg, E., Eythorsdottir, E., Li, M.-H., Kettunen-PrÄbel, A., et al.  
639 (2015). Utilization of farm animal genetic resources in a changing agro-ecological environment  
640 in the Nordic countries. *Front. Genet.* 6, 52. doi:10.3389/fgene.2015.00052.
- 641 Kantanen, J., Olsaker, I., Holm, L.-E., Lien, S., Vilkki, J., Brusgaard, K., et al. (2000). Genetic  
642 diversity and population structure of 20 north European cattle breeds. *J. Hered.* 91, 446–457.  
643 doi:10.1093/jhered/91.6.446.
- 644 Kawahara-Miki, R., Tsuda, K., Shiwa, Y., Arai-Kichise, Y., Matsumoto, T., Kanesaki, Y., et al.  
645 (2011). Whole-genome resequencing shows numerous genes with nonsynonymous SNPs in the  
646 Japanese native cattle Kuchinoshima-Ushi. *BMC Genomics* 12, 103. Available at:  
647 <http://www.biomedcentral.com/1471-2164/12/103>.
- 648 Kim, J., Hanotte, O., Mwai, O. A., Dessie, T., Bashir, S., Diallo, B., et al. (2017). The genome  
649 landscape of indigenous African cattle. *Genome Biol.* 18, 34. doi:10.1186/s13059-017-1153-y.
- 650 Kinsella, R. J., KÄhÄri, A., Haider, S., Zamora, J., Proctor, G., Spudich, G., et al. (2011). Ensembl  
651 BioMarts: a hub for data retrieval across taxonomic space. *Database* 2011, bar030-bar030.  
652 Available at: <http://dx.doi.org/10.1093/database/bar030>.
- 653 Kopoteva, I., and Partanen, U. (2009). “Sakha Ynaga□: Cattle of the Yakuts.,” in *A historical*  
654 *excursion to Northern Sakha.*, eds. J. Granberg, K. Soini, and J. Kantanen (Helsinki:  
655 Suomalainen Tiedeakatemia), 75–116.

- 656 Kumar, S., and Subramanian, S. (2002). Mutation rates in mammalian genomes. *Proc. Natl. Acad.*  
657 *Sci.* 99, 803–808. doi:10.1073/pnas.022629899.
- 658 Lachance, J., Vernot, B., Elbers, C. C., Ferwerda, B., Froment, A., Bodo, J.-M., et al. (2012).  
659 Evolutionary history and adaptation from high-coverage whole-genome sequences of diverse  
660 African hunter-gatherers. *Cell* 150, 457–469. doi:10.1016/j.cell.2012.07.009.
- 661 Li, H., and Durbin, R. (2011). Inference of human population history from individual whole-genome  
662 sequences. *Nature* 475, 493–496. Available at:  
663 [http://www.nature.com/nature/journal/v475/n7357/abs/nature10231.html#supplementary-](http://www.nature.com/nature/journal/v475/n7357/abs/nature10231.html#supplementary-information)  
664 [information.](http://www.nature.com/nature/journal/v475/n7357/abs/nature10231.html#supplementary-information)
- 665 Li, H., Handsaker, B., Wysoker, A., Fennell, T., Ruan, J., Homer, N., et al. (2009). The Sequence  
666 Alignment/Map format and SAMtools. *Bioinformatics* 25, 2078–2079.  
667 doi:10.1093/bioinformatics/btp352.
- 668 Li, M.-H., and Kantanen, J. (2010). Genetic structure of Eurasian cattle ( *Bos taurus* ) based on  
669 microsatellites: clarification for their breed classification. *Anim. Genet.* 41, 150–158.  
670 doi:10.1111/j.1365-2052.2009.01980.x.
- 671 Li, M., Tapio, I., Vilkki, J., Ivanova, Z., Kiselyova, T., Marzanov, N., et al. (2007). The genetic  
672 structure of cattle populations (*Bos taurus*) in northern Eurasia and the neighbouring Near  
673 Eastern regions: implications for breeding strategies and conservation. *Mol. Ecol.* 16, 3839–  
674 3853. doi:10.1111/j.1365-294X.2007.03437.x.
- 675 Li, M., Tian, S., Yeung, C. K. L., Meng, X., Tang, Q., Niu, L., et al. (2014). Whole-genome  
676 sequencing of Berkshire (European native pig) provides insights into its origin and  
677 domestication. *Sci.Rep.* 4. Available at: <http://10.0.4.14/srep04678>.

- 678 Librado, P., Der Sarkissian, C., Ermini, L., Schubert, M., Jónsson, H., Albrechtsen, A., et al. (2015).  
679 Tracking the origins of Yakutian horses and the genetic basis for their fast adaptation to  
680 subarctic environments. *Proc. Natl. Acad. Sci.* 112, E6889–E6897.  
681 doi:10.1073/pnas.1513696112.
- 682 Librado, P., Fages, A., Gaunitz, C., Leonardi, M., Wagner, S., Khan, N., et al. (2016). The  
683 Evolutionary Origin and Genetic Makeup of Domestic Horses. *Genetics* 204, 423–434.  
684 doi:10.1534/genetics.116.194860.
- 685 Liu, S., Lorenzen, E. D., Fumagalli, M., Li, B., Harris, K., Xiong, Z., et al. (2014). Population  
686 Genomics Reveal Recent Speciation and Rapid Evolutionary Adaptation in Polar Bears. *Cell*  
687 157, 785–794. doi:10.1016/j.cell.2014.03.054.
- 688 MacLeod, I. M., Larkin, D. M., Lewin, H. A., Hayes, B. J., and Goddard, M. E. (2013). Inferring  
689 Demography from Runs of Homozygosity in Whole-Genome Sequence, with Correction for  
690 Sequence Errors. *Mol. Biol. Evol.* 30, 2209–2223. doi:10.1093/molbev/mst125.
- 691 Malke, H. (1990). J. SAMBROCK, E. F. FRITSCH and T. MANIATIS, *Molecular Cloning, A*  
692 *Laboratory Manual* (Second Edition), Volumes 1, 2 and 3. 1625 S., zahlreiche Abb. und Tab.  
693 Cold Spring Harbor 1989. Cold Spring Harbor Laboratory Press. \$ 115.00. ISBN: 0-87969-309-  
694 6. *J. Basic Microbiol.* 30, 623. doi:10.1002/jobm.3620300824.
- 695 McKenna, A., Hanna, M., Banks, E., Sivachenko, A., Cibulskis, K., Kernytsky, A., et al. (2010). The  
696 Genome Analysis Toolkit: A MapReduce framework for analyzing next-generation DNA  
697 sequencing data. *Genome Res.* 20, 1297–1303. doi:10.1101/gr.107524.110.
- 698 McManus, K. F., Kelley, J. L., Song, S., Veeramah, K. R., Woerner, A. E., Stevison, L. S., et al.  
699 (2015). Inference of Gorilla Demographic and Selective History from Whole-Genome Sequence

- 700 Data. *Mol. Biol. Evol.* 32, 600–612. doi:10.1093/molbev/msu394.
- 701 Mei, C., Wang, H., Liao, Q., Wang, L., Cheng, G., Wang, H., et al. (2018). Genetic Architecture and  
702 Selection of Chinese Cattle Revealed by Whole Genome Resequencing. *Mol. Biol. Evol.* 35,  
703 688–699. doi:10.1093/molbev/msx322.
- 704 Murray, C., Huerta-Sanchez, E., Casey, F., and Bradley, D. G. (2010). Cattle demographic history  
705 modelled from autosomal sequence variation. *Philos. Trans. R. Soc. London B Biol. Sci.* 365,  
706 2531–2539. Available at: <http://rstb.royalsocietypublishing.org/content/365/1552/2531.abstract>.
- 707 Nielsen, R., Hellmann, I., Hubisz, M., Bustamante, C., and Clark, A. G. (2007). Recent and ongoing  
708 selection in the human genome. *Nat. Rev. Genet.* 8, 857–868. doi:10.1038/nrg2187.
- 709 Niimura, Y. (2011). Olfactory Receptor Multigene Family in Vertebrates: From the Viewpoint of  
710 Evolutionary Genomics. *Curr. Genomics* 13, 103–114. doi:10.2174/138920212799860706.
- 711 Niimura, Y., Matsui, A., and Touhara, K. (2014). Extreme expansion of the olfactory receptor gene  
712 repertoire in African elephants and evolutionary dynamics of orthologous gene groups in 13  
713 placental mammals. *Genome Res.* 24, 1485–1496. doi:10.1101/gr.169532.113.
- 714 Odegård, J., Yazdi, M. H., Sonesson, A. K., and Meuwissen, T. H. E. (2009). Incorporating desirable  
715 genetic characteristics from an inferior into a superior population using genomic selection.  
716 *Genetics* 181, 737–45. doi:10.1534/genetics.108.098160.
- 717 Ogorevc, J., Kunej, T., Razpet, A., and Dovc, P. (2009). Database of cattle candidate genes and  
718 genetic markers for milk production and mastitis. *Anim. Genet.* 40, 832–851.  
719 doi:10.1111/j.1365-2052.2009.01921.x.
- 720 Patterson, N., Price, A. L., and Reich, D. (2006). Population Structure and Eigenanalysis. *PLoS*



- 721 *Genet* 2, e190. Available at: <http://dx.plos.org/10.1371%2Fjournal.pgen.0020190>.
- 722 Pavlidis, P., Živkovic, D., Stamatakis, A., and Alachiotis, N. (2013). SweeD: Likelihood-Based  
723 Detection of Selective Sweeps in Thousands of Genomes. *Mol. Biol. Evol.* 30, 2224–2234.  
724 doi:10.1093/molbev/mst112.
- 725 Purać, J., Pond, D. W., Grubor-Lajšić, G., Kojić, D., Blagojević, D. P., Worland, M. R., et al. (2011).  
726 Cold hardening induces transfer of fatty acids between polar and nonpolar lipid pools in the  
727 Arctic collembollan *Megaphorura arctica*. *Physiol. Entomol.* 36, 135–140. doi:10.1111/j.1365-  
728 3032.2010.00772.x.
- 729 Sasaki, Y., Nagai, K., Nagata, Y., Doronbekov, K., Nishimura, S., Yoshioka, S., et al. (2006).  
730 Exploration of genes showing intramuscular fat deposition-associated expression changes in  
731 *musculus longissimus* muscle. *Anim. Genet.* 37, 40–46. doi:10.1111/j.1365-2052.2005.01380.x.
- 732 Stafuzza, N. B., Zerlotini, A., Lobo, F. P., Yamagishi, M. E. B., Chud, T. C. S., Caetano, A. R., et al.  
733 (2017). Single nucleotide variants and InDels identified from whole-genome re-sequencing of  
734 Guzerat, Gyr, Girolando and Holstein cattle breeds. *PLoS One* 12, e0173954. Available at:  
735 <https://doi.org/10.1371/journal.pone.0173954>.
- 736 Stajich, J. E., Block, D., Boulez, K., Brenner, S. E., Chervitz, S. A., Dagdigian, C., et al. (2002). The  
737 Bioperl Toolkit: Perl Modules for the Life Sciences. *Genome Res.* 12, 1611–1618.  
738 doi:10.1101/gr.361602.
- 739 Stothard, P., Choi, J.-W., Basu, U., Sumner-Thomson, J. M., Meng, Y., Liao, X., et al. (2011). Whole  
740 genome resequencing of black Angus and Holstein cattle for SNP and CNV discovery. *BMC*  
741 *Genomics* 12, 559. doi:10.1186/1471-2164-12-559.
- 742 Szyda, J., FrÄ...szczak, M., Mielczarek, M., Giannico, R., Minozzi, G., Nicolazzi, E. L., et al.

- 743 (2015). The assessment of inter-individual variation of whole-genome DNA sequence in 32  
744 cows. *Mamm. Genome* 26, 658–665. doi:10.1007/s00335-015-9606-7.
- 745 Tsuda, K., Kawahara-Miki, R., Sano, S., Imai, M., Noguchi, T., Inayoshi, Y., et al. (2013). Abundant  
746 sequence divergence in the native Japanese cattle Mishima-Ushi (*Bos taurus*) detected using  
747 whole-genome sequencing. *Genomics* 102, 372–378. doi:10.1016/j.ygeno.2013.08.002.
- 748 Van der Auwera A., G., Carneiro, M. O., Hartl, C., Poplin, R., del Angel, G., Levy-Moonshine, A., et  
749 al. (2013). From FastQ data to high confidence variant calls: the Genome Analysis Toolkit best  
750 practices pipeline. *Curr. Protoc. Bioinforma. / Ed. board, Andreas D.Baxevanis ...[et al.]* 11,  
751 11.10.1-11.10.33. doi:10.1002/0471250953.bi1110s43.
- 752 Wang, G.-D., Fan, R.-X., Zhai, W., Liu, F., Wang, L., Zhong, L., et al. (2014a). Genetic  
753 Convergence in the Adaptation of Dogs and Humans to the High-Altitude Environment of the  
754 Tibetan Plateau. *Genome Biol. Evol.* 6, 2122–2128. Available at:  
755 <http://dx.doi.org/10.1093/gbe/evu162>.
- 756 Wang, K., Li, M., and Hakonarson, H. (2010). ANNOVAR: functional annotation of genetic variants  
757 from high-throughput sequencing data. *Nucleic Acids Res.* 38, e164–e164.  
758 doi:10.1093/nar/gkq603.
- 759 Wang, M.-S., Li, Y., Peng, M.-S., Zhong, L., Wang, Z.-J., Li, Q.-Y., et al. (2015). Genomic Analyses  
760 Reveal Potential Independent Adaptation to High Altitude in Tibetan Chickens. *Mol. Biol. Evol.*  
761 32, 1880–1889. Available at: <http://dx.doi.org/10.1093/molbev/msv071>.
- 762 Wang, M., Yu, Y., Haberer, G., Marri, P. R., Fan, C., Goicoechea, J. L., et al. (2014b). The genome  
763 sequence of African rice (*Oryza glaberrima*) and evidence for independent domestication. *Nat.*  
764 *Genet.* 46, 982–988. Available at: <http://10.0.4.14/ng.3044>.

- 765 Watanabe, N., Satoh, Y., Fujita, T., Ohta, T., Kose, H., Muramatsu, Y., et al. (2011). Distribution of  
766 allele frequencies at TTN g.231054C > T, RPL27A g.3109537C > T and AKIRIN2 c.\*188G >  
767 A between Japanese Black and four other cattle breeds with differing historical selection for  
768 marbling. *BMC Res. Notes* 4, 10. Available at: <http://www.biomedcentral.com/1756-0500/4/10>.
- 769 Williams, J. L., Dunner, S., Valentini, A., Mazza, R., Amarger, V., Checa, M. L., et al. (2009).  
770 Discovery, characterization and validation of single nucleotide polymorphisms within 206  
771 bovine genes that may be considered as candidate genes for beef production and quality. *Anim.*  
772 *Genet.* 40, 486–491. doi:10.1111/j.1365-2052.2009.01874.x.
- 773 Yang, J., Li, W.-R., Lv, F.-H., He, S.-G., Tian, S.-L., Peng, W.-F., et al. (2016). Whole-Genome  
774 Sequencing of Native Sheep Provides Insights into Rapid Adaptations to Extreme  
775 Environments. *Mol. Biol. Evol.* 33, 2576–2592. doi:10.1093/molbev/msw129.
- 776 Yokoyama, Y., Lambeck, K., De Deckker, P., Johnston, P., and Fifield, L. K. (2000). Timing of the  
777 Last Glacial Maximum from observed sea-level minima. *Nature* 406, 713. Available at:  
778 <http://10.0.4.14/35021035>.
- 779 Zhang, H., Pajmans, J. L. A., Chang, F., Wu, X., Chen, G., Lei, C., et al. (2013). Morphological and  
780 genetic evidence for early Holocene cattle management in northeastern China. *Nat. Commun.* 4,  
781 2755. Available at: <http://10.0.4.14/ncomms3755>.
- 782 Zhao, S., Zheng, P., Dong, S., Zhan, X., Wu, Q., Guo, X., et al. (2013). Whole-genome sequencing  
783 of giant pandas provides insights into demographic history and local adaptation. *Nat. Genet.* 45,  
784 67–71. Available at:  
785 <http://www.nature.com/ng/journal/v45/n1/abs/ng.2494.html#supplementary-information>.
- 786 Zimin, A., Delcher, A., Florea, L., Kelley, D., Schatz, M., Puiu, D., et al. (2009). A whole-genome

787 assembly of the domestic cow, *Bos taurus*. *Genome Biol.* 10, R42. Available at:  
788 <http://genomebiology.com/2009/10/4/R42>.

789

790 **Figures**

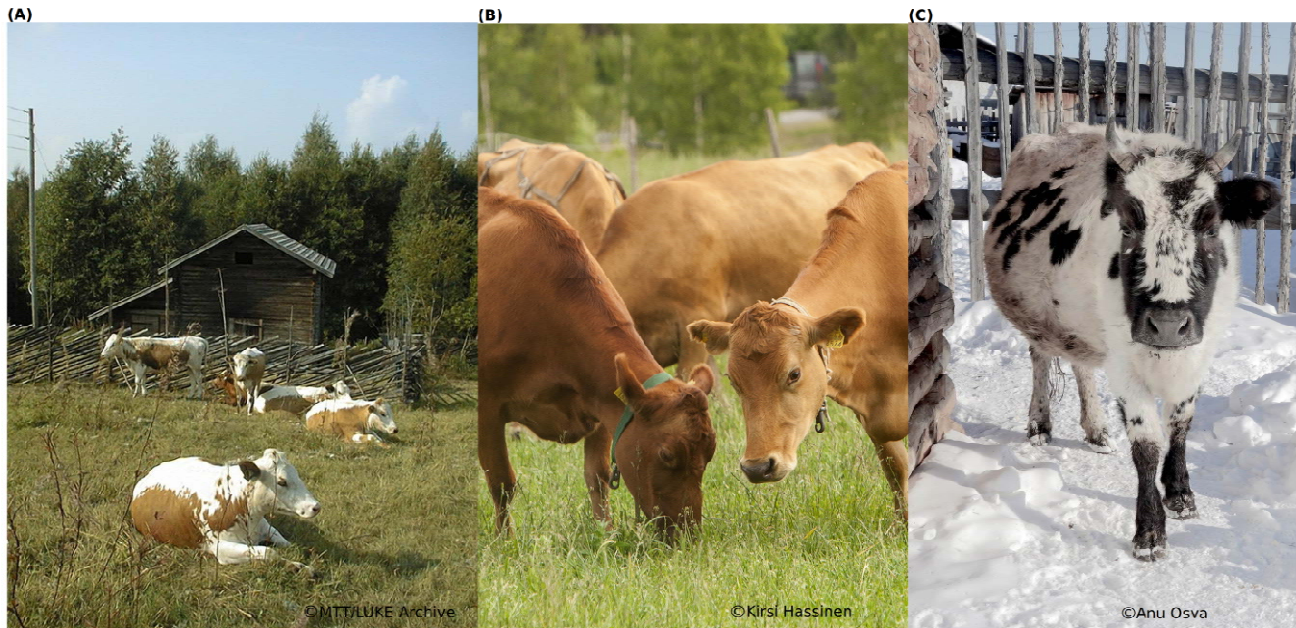

791

792

793 **Figure 1.** Three North Eurasian native cattle breeds are included in this study. (A) Eastern Finncattle  
794 are typically red-sided and polled. Cattle breeding in Finland was started with this breed, and the  
795 breed's herd book was established in 1898. The breed was threatened with extinction in the 1970s  
796 and 1980s. The current census size is 1,600 cows, and the annual milk yield on average 4,000 Kgs.  
797 (B) Western Finncattle are solid light or dark brown and polled. The breed is one of the most  
798 productive native cattle breeds: the average annual milk yield is about 7,000 Kgs.(C) The Yakutian  
799 cattle are characterized by being purebred aboriginal native cattle from Sakha. Adult Yakutian cows  
800 weigh typically 350-400 Kgs and their height at the withers is 110-112cm on average. The animals  
801 are well adapted to Siberian harsh conditions where the temperature falls below -50°C in long

802 winters. The average annual milk yield is 1,000 Kgs. Please do not copy, use or upload the  
 803 photographs without permission of the copyright holders.

804

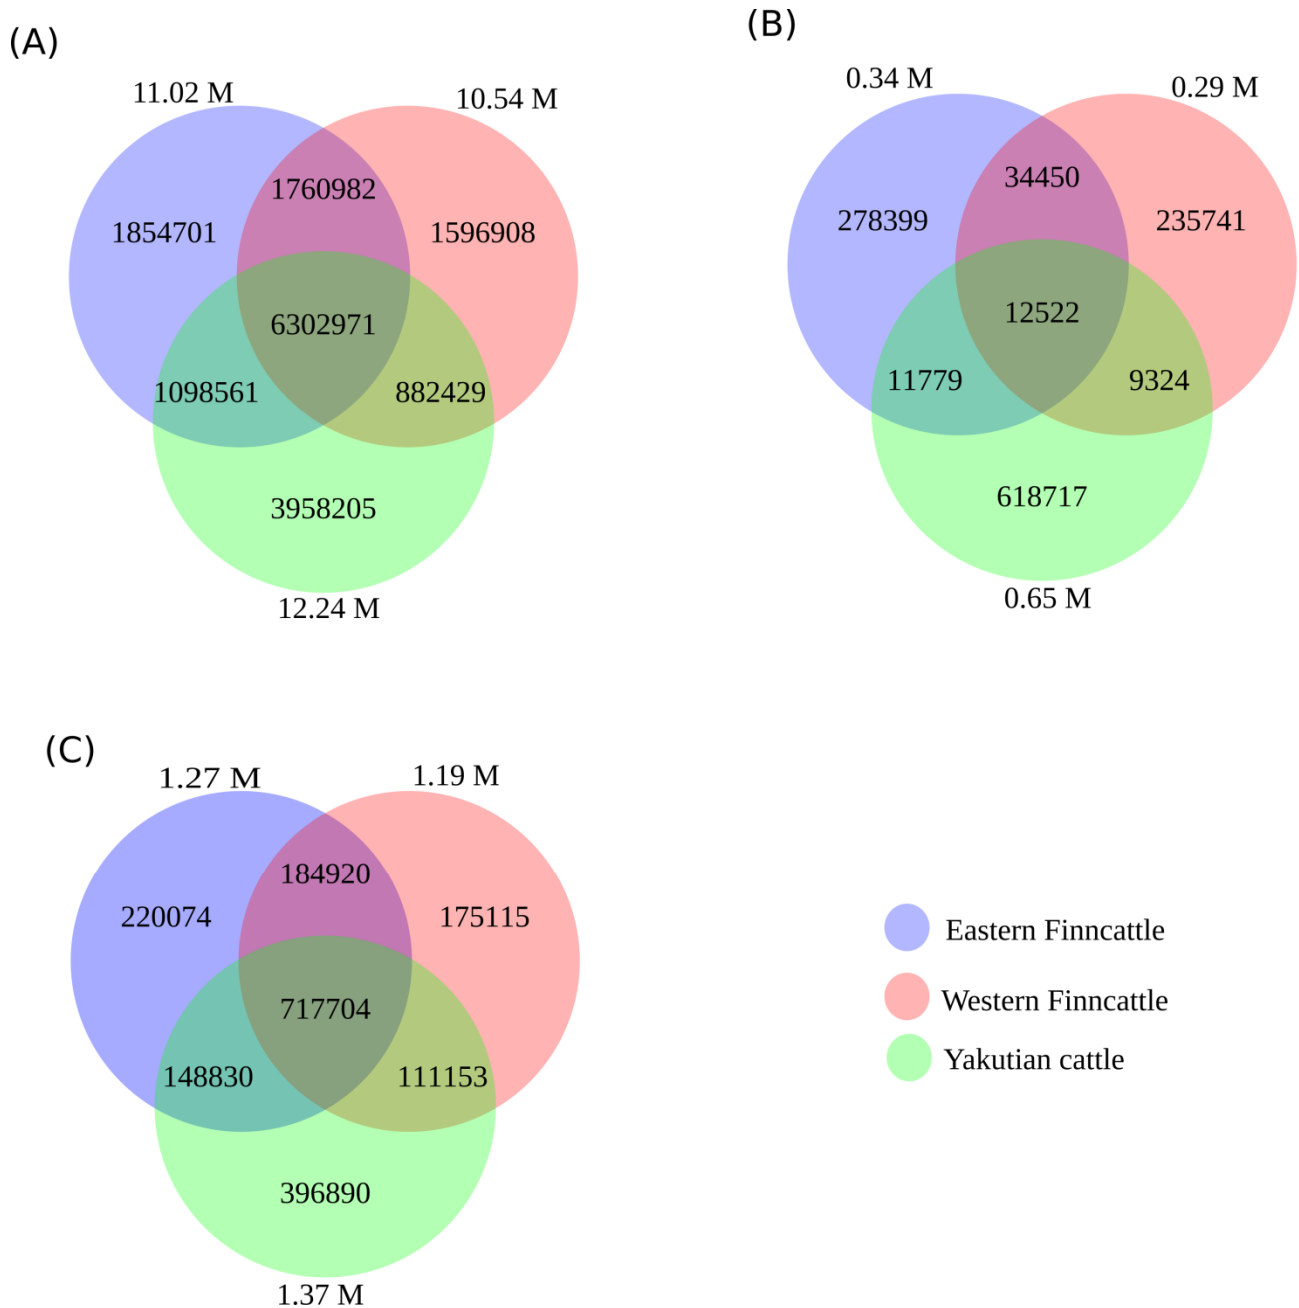

805

806 **Figure 2.** Venn diagram showing overlapping and unique SNPs/indels between the three breeds

807 (Eastern Finncattle, Western Finncattle and Yakutian). The numbers in parentheses outside the

808 circles are the total number of detected SNPs from each breed. The numbers in the circle components

809 show specific SNPs for each breed or overlapping SNPs/indels between any two breeds or among  
 810 three breeds. **(A)** The identified shared and specific SNPs for each breed, **(B)** the identified shared  
 811 and specific novel SNPs for each breed, and **(C)** the identified shared and specific indels for each  
 812 breed.  
 813

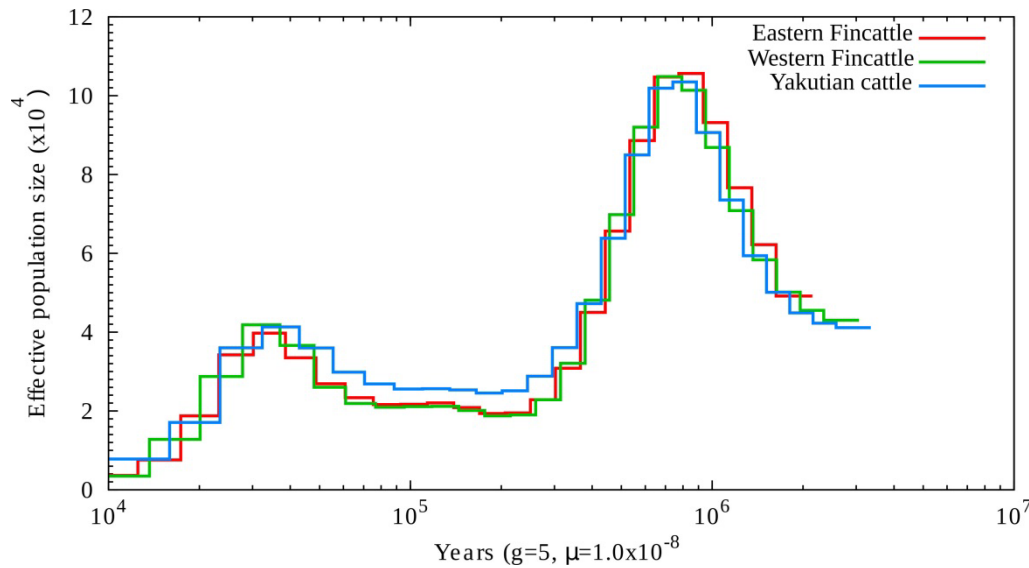

814  
 815  
 816 **Figure 3** Demographic history of the northernmost cattle breed reconstructed from three cattle  
 817 genomes, one from each breed, by using PSMC. The X axis shows the time in thousand years  
 818 (Kyr), and the Y axis shows the effective population size.

819  
 820 **Tables**

821 **Table 1.** Summary of sequencing and short read alignment results

|                        | Eastern<br>Fincattle | Western<br>Fincattle | Yakutian<br>cattle | Overall<br>sample |
|------------------------|----------------------|----------------------|--------------------|-------------------|
| Number of individuals  | 5                    | 5                    | 5                  | 15                |
| Paired-end length (bp) | 100                  | 100                  | 100                | 100               |



|                                                    |          |          |          |          |
|----------------------------------------------------|----------|----------|----------|----------|
| Average reads per individual                       | 352.73 M | 347.14 M | 342.33 M | 347.4 M  |
| Average sequence depth per individual <sup>a</sup> | 13.21X   | 13.00X   | 12.82X   | 13.01X   |
| Average map reads per individual                   | 348.42 M | 340.12 M | 337.50 M | 342,02 M |
| Average unique map reads per individual            | 316.89 M | 312.58 M | 309.19 M | 312.88 M |
| Average read mapping rate                          | 98.78%   | 97.97%   | 98.59%   | 98.45%   |
| Average coverage rate                              | 98.42%   | 98.22%   | 98.46%   | 98.37%   |

822 <sup>a</sup> Average sequence depth per individual was computed by dividing the clean reads by the reference  
 823 genome size.

824

825 **Table 2.** Functional annotation of the detected SNPs and indels

|                                         |                             | <b>Eastern<br/>Finncattle</b> | <b>Western<br/>Finncattle</b> | <b>Yakutian<br/>cattle</b> |
|-----------------------------------------|-----------------------------|-------------------------------|-------------------------------|----------------------------|
| <b>S<br/>N<br/>P</b>                    | <b>Total number of SNPs</b> | 11,017,215                    | 10,543,290                    | 12,242,166                 |
|                                         | <b>Intergenic</b>           | 7,998,914                     | 7,662,604                     | 8,845,911                  |
|                                         | <b>Intronic</b>             | 2,764,951                     | 2,643,821                     | 3,114,622                  |
|                                         | <b>Exonic<sup>a</sup></b>   |                               |                               |                            |
|                                         | Nonsynonymous               | 30,982                        | 28,733                        | 32,782                     |
|                                         | Stop gain                   | 294                           | 284                           | 310                        |
|                                         | Stop loss                   | 23                            | 18                            | 19                         |
|                                         | Synonymous                  | 41,111                        | 38,137                        | 46,950                     |
|                                         | <b>Upstream</b>             | 74,552                        | 69,369                        | 82,170                     |
|                                         | <b>Downstream</b>           | 74,198                        | 70,815                        | 83,549                     |
| <b>Upstream; downstream<sup>b</sup></b> | 1,636                       | 1,534                         | 2,036                         |                            |
| <b>UTR<sup>c</sup></b>                  | 25,545                      | 23,342                        | 28,273                        |                            |

|                                  |                                         |           |           |           |
|----------------------------------|-----------------------------------------|-----------|-----------|-----------|
|                                  | <b>Splicing</b>                         | 417       | 388       | 459       |
|                                  | <b>ncRNA</b>                            | 4,593     | 4,256     | 5,086     |
|                                  |                                         |           |           |           |
| <b>I<br/>n<br/>d<br/>e<br/>l</b> | <b>Total number of indels</b>           | 1,275,128 | 1,188,892 | 1,374,577 |
|                                  | <b>Intergenic</b>                       | 942,143   | 878,007   | 1,012,733 |
|                                  | <b>Intronic</b>                         | 332,504   | 310,089   | 363,783   |
|                                  | <b>Exonic<sup>a</sup></b>               |           |           |           |
|                                  | Nonframeshift                           | 397       | 327       | 427       |
|                                  | Stop gain                               | 24        | 22        | 27        |
|                                  | Stop loss                               | 1         | 1         | 0         |
|                                  | Frameshift                              | 1,045     | 972       | 1,148     |
|                                  | <b>Upstream</b>                         | 9,269     | 8,286     | 9,861     |
|                                  | <b>Downstream</b>                       | 10,611    | 9,609     | 11,377    |
|                                  | <b>Upstream; downstream<sup>b</sup></b> | 250       | 218       | 282       |
|                                  | <b>UTR<sup>c</sup></b>                  | 3,380     | 3,101     | 3,767     |
|                                  | <b>Splicing</b>                         | 248       | 233       | 268       |
| <b>ncRNA</b>                     | 406                                     | 371       | 437       |           |

826 <sup>a</sup> Exonic = “exonic” and “exonic; splicing” as annotated by ANNOVAR

827 <sup>b</sup> Upstream; downstream = variant located in downstream and upstream regions

828 <sup>c</sup> UTR = “UTR3” and “UTR5” as annotated by ANNOVAR

829
